# Supplementary material for: Sex specific effects of adoptive Tregs transfer on the brain and periphery in maternal immune activation offspring rescuing immune dysregulation
Source: Research Square preprint supplement (doi:10.21203/rs.3.rs-8414528/v1), 2026-02-01

**Figure S2** Splenocytes from female offspring were stimulated with Concanavalin A for 48 hours. Cytokines from cell culture supernatant were measured using Multiplex Luminex assays. (**A**) IL-25, IL-6 and IL-2 were significantly different across various study groups. (**B**) Cytokine correlations in female Saline-Saline, Saline-Tregs, and Poly I:C-Saline study groups all had strong cytokine production that correlated with each other. However, in female Poly I:C-Tregs offspring, many of these strong correlations were not observed.
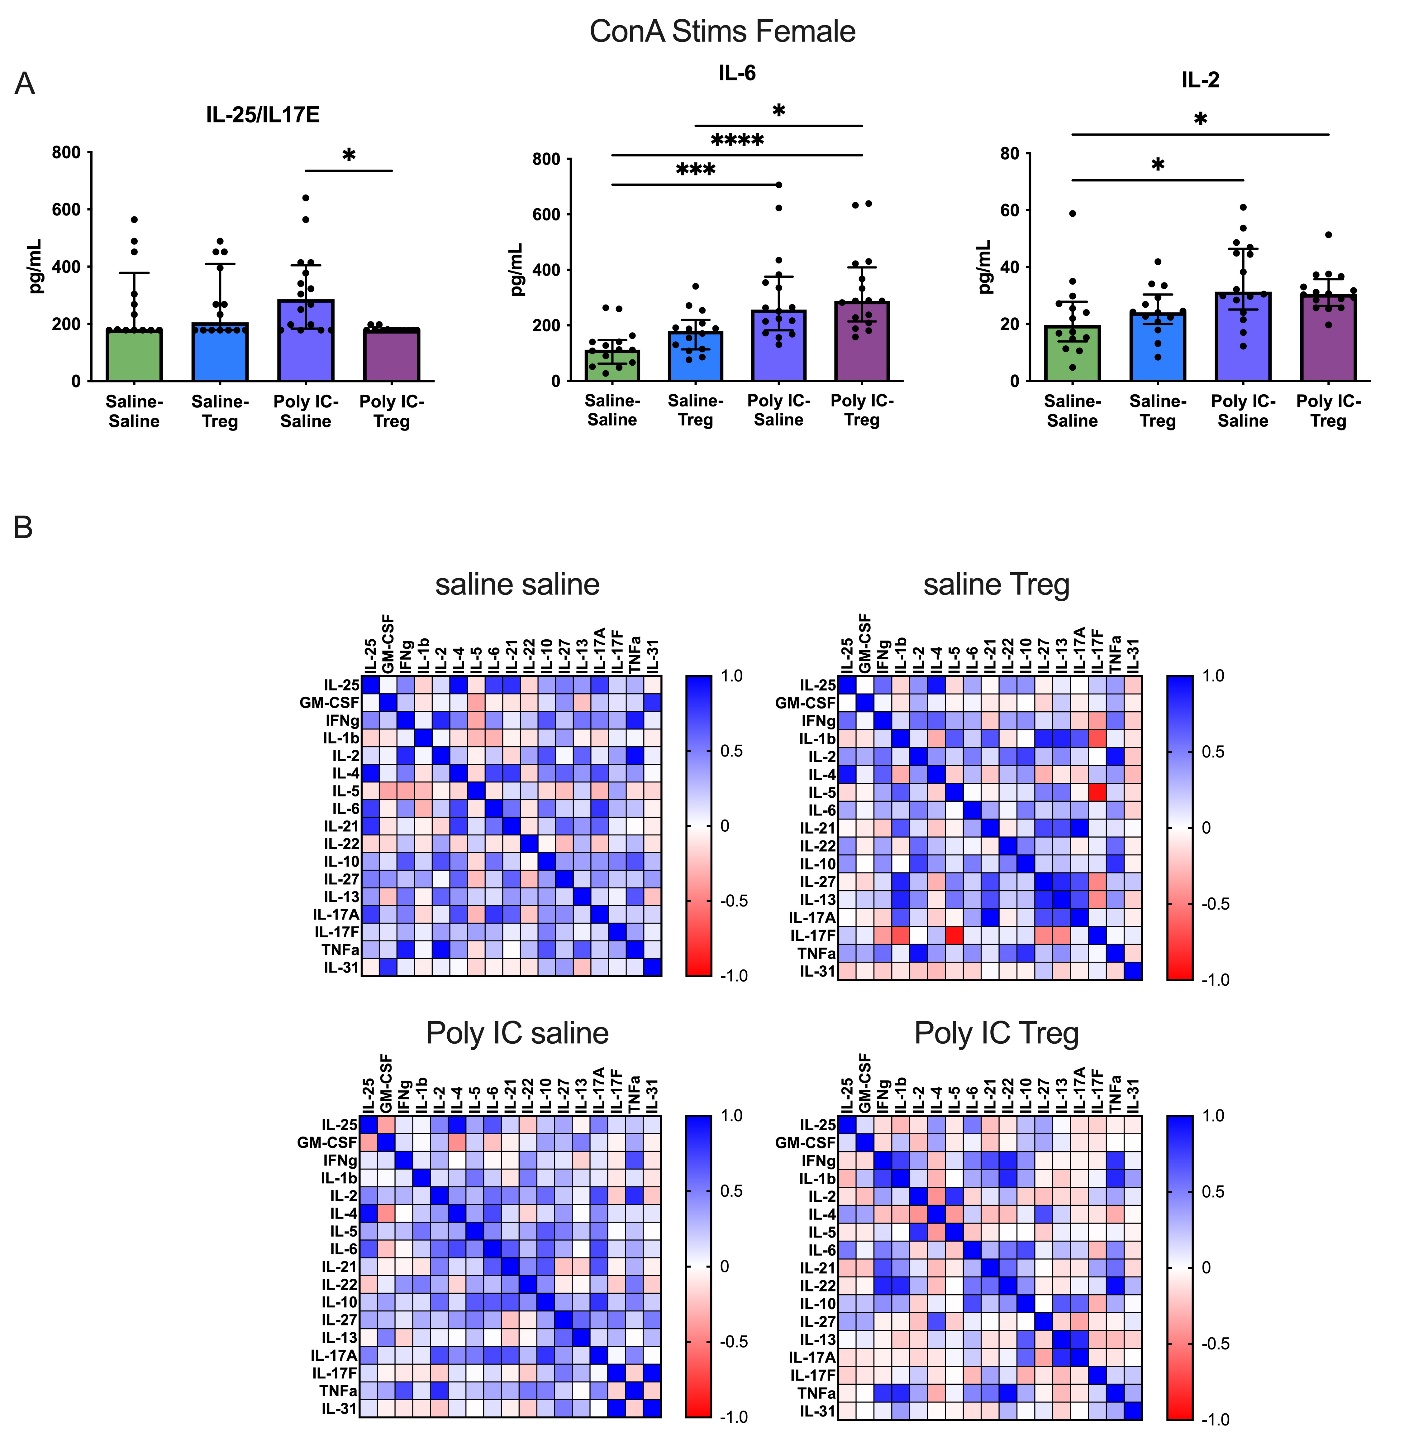

Supplement: Supplementary file 1 [file 142c4f86b5d04f938f30505b.docx]
