# Supplementary material for: Sex specific effects of adoptive Tregs transfer on the brain and periphery in maternal immune activation offspring rescuing immune dysregulation
Source: Research Square preprint supplement (doi:10.21203/rs.3.rs-8414528/v1), 2026-02-01
Supplement: Supplementary file 4 [file 601d3ae3bcd9738cba7671e3.docx]

**
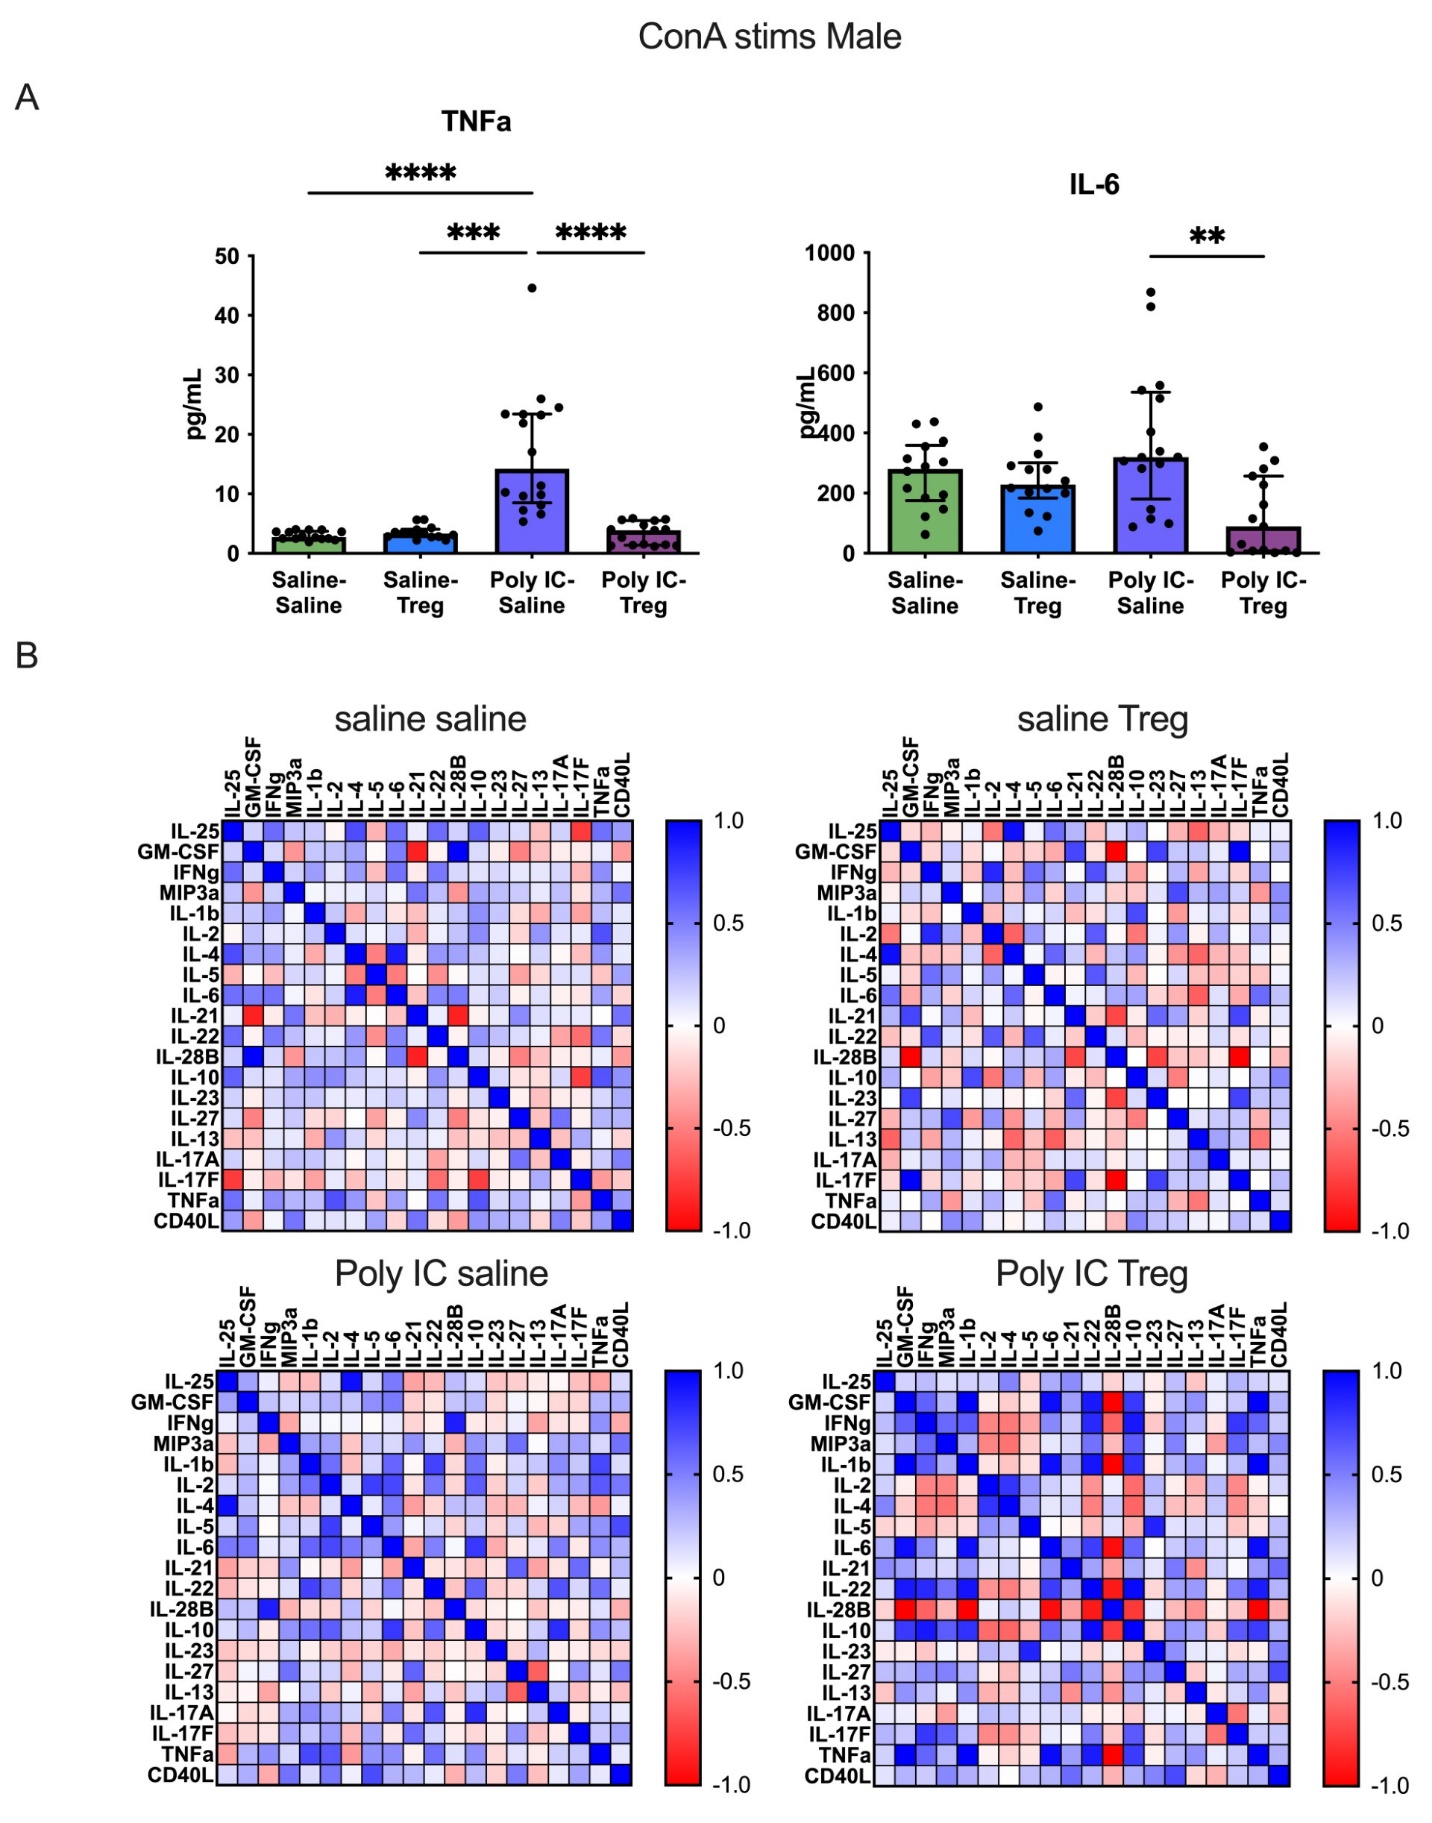
Figure S1** Splenocytes from male offspring were stimulated with Concanavalin A for 48 hours. Cytokines from cell culture supernatant were measured using Multiplex Luminex assays. (**A**)TNFα and IL-6 were significantly downregulated in male Poly I:C-Tregs offspring compared to their Poly I:C-Saline counterparts. (**B**) Cytokine correlations matricies following Con A stimulation in each group. In male Poly I:C-Tregs offspring, several cytokines were strongly correlated, whereas this was not observed in other study groups.
